# Supplementary material for: Intravenous Infusion of Nucleated Peripheral Blood Cells Restores Fertility in Mice with Chemotherapy-Induced Premature Ovarian Failure
Source: PubMed Central journal article supplement (PMC6163893; doi:10.3390/biomedicines6030093), 2018-09-15
Supplement: biomedicines-06-00093-s001.pdf [file biomedicines-06-00093-s001.pdf]

**Table S1: Primers sequence**

| <b>Gene</b>   | <b>Primer name</b><br>(5' → 3')                                                 |
|---------------|---------------------------------------------------------------------------------|
| <b>CD34</b>   | Forward Primer CTACAACACCTAGTACCCTTGGA<br>Reverse Primer GGTGAACACTGTGCTGATTACA |
| <b>Csf1</b>   | Forward Primer TGGCGAGCAGGAGTATCAC<br>Reverse Primer AGGTCTCCATCTGACTGTCAAT     |
| <b>Inhba</b>  | Forward Primer CCTCCCAAAGGATGTACCCAA<br>Reverse Primer CTCTATCTCCACATACCCGTTCT  |
| <b>Kitl</b>   | Forward Primer AATCCTCTCGTCAAACTGAAGG<br>Reverse Primer CCATCTCGCTTATCCAACAATGA |
| <b>Notch4</b> | Forward Primer TGTGAACGTGATGTCAACGG<br>Reverse Primer ACAGTCTGGGCCTATGAAACC     |
| <b>Vegfa</b>  | Forward Primer AGGGCAGAATCATCACGAA<br>Reverse Primer AGGGTCTCGATTGGATGGCA       |
